# Supplementary material for: Wheat Drought-Responsive Grain Proteome Analysis by Linear and Nonlinear 2-DE and MALDI-TOF Mass Spectrometry
Source: Int J Mol Sci. 2012 Nov 29;13(12):16065–83. doi: 10.3390/ijms131216065 (PMC3546679; doi:10.3390/ijms131216065)
Supplement: Supplementary file 1 [file ijms-13-16065-s001.pdf]

## Supplementary Information

**Table S1.** Differentially expressed non-prolamins under control and drought stress conditions in Janz and Kauz by linear 2-DE (pH 3–10, 18 cm) and MALDI mass spectrometry.

| Sport ID                 | Protein name                                           | Plant species              | Accession<br>No (gi:) | Theor.<br>Mr/pI <sup>a</sup> | Exp.<br>Mr/pI <sup>b</sup> | Score <sup>c</sup> | PN <sup>d</sup> | Method <sup>e</sup> |
|--------------------------|--------------------------------------------------------|----------------------------|-----------------------|------------------------------|----------------------------|--------------------|-----------------|---------------------|
| <b>carbon metabolism</b> |                                                        |                            |                       |                              |                            |                    |                 |                     |
| 5                        | isocitrate dehydrogenase<br>NADP-dependent             | <i>Medicago truncatula</i> | 92875135              | 48/6.02                      | 45/5.99                    | 98                 | 14              | MS                  |
| 22                       | beta amylase                                           | <i>Triticum aestivum</i>   | 32400764              | 31.1/8.6                     | 60/5.42                    | 312                | 9               | MS/MS               |
| 33                       | beta amylase                                           | <i>Triticum aestivum</i>   | 32400764              | 31.1/8.6                     | 62/5.16                    | 389                | 8               | MS/MS               |
| 65                       | beta amylase                                           | <i>Triticum aestivum</i>   | 32400764              | 31.1/8.6                     | 59/5.53                    | 573                | 13              | MS/MS               |
| 111                      | Glyceraldehyde-3-phosphate<br>dehydrogenase            | <i>Triticum aestivum</i>   | 120680                | 36/6.67                      | 78/6.25                    | 416                | 14              | MS                  |
| 112                      | Glyceraldehyde-3-phosphate<br>dehydrogenase            | <i>Triticum aestivum</i>   | 148508784             | 36/7.08                      | 78/6.37                    | 597                | 17              | MS                  |
| 7                        | cytosolic glyceraldehyde-3-<br>phosphate dehydrogenase | <i>Triticum aestivum</i>   | 7579064               | 25.4/7.83                    | 40/6.65                    | 348                | 9               | MS/MS               |
| 21                       | Glyceraldehyde 3-phosphate<br>dehydrogenase            | <i>Triticum aestivum</i>   | 120680                | 36.0/6.67                    | 65.5/6.65                  | 416                | 14              | MS                  |
| 54                       | Glyceraldehyde 3-phosphate<br>dehydrogenase            | <i>Triticum aestivum</i>   | 18978                 | 42/6.89                      | 36/6.67                    | 94                 | 12              | MS                  |
| 62                       | Glyceraldehyde 3-phosphate<br>dehydrogenase            | <i>Triticum aestivum</i>   | 18978                 | 42/6.82                      | 36/6.67                    | 351                | 4               | MS                  |
| 12                       | small subunit ADP glucose<br>pyrophosphorylase         | <i>Triticum aestivum</i>   | 7340287               | 52/5.53                      | 44/5.74                    | 216                | 12              | MS                  |
| 38                       | small subunit ADP glucose<br>pyrophosphorylase         | <i>Triticum aestivum</i>   | 7340287               | 52.3/5.53                    | 53/5.61                    | 761                | 21              | MS/MS               |
| 25                       | ADP-glucose<br>pyrophosphorylase large<br>subunit      | <i>Triticum aestivum</i>   | 995746                | 6.19/57                      | 6.12/57                    | 87                 | 14              | MS                  |

Table S1. Cont.

|                                   |                                                                                   |                                    |           |           |         |     |    |       |
|-----------------------------------|-----------------------------------------------------------------------------------|------------------------------------|-----------|-----------|---------|-----|----|-------|
| 27                                | cytoplasmic aldolase                                                              | <i>Oryza sativa Japonica Group</i> | 218157    | 39.2/6.56 | 41/7.05 | 397 | 11 | MS/MS |
| 70                                | Xylose isomerase                                                                  | <i>Triticum aestivum</i>           | 6175480   | 53.9/5.31 | 56/5.50 | 397 | 16 | MS/MS |
| 71                                | NADPH producing<br>dehydrogenase of the<br>oxidative pentose phosphate<br>pathway | <i>Zea mays</i>                    | 162463282 | 53.3/5.92 | 51/5.81 | 411 | 14 | MS/MS |
| 63                                | glucose and ribitol<br>dehydrogenase homolog -<br>barley                          | <i>Oryza sativa Japonica Group</i> | 7431022   | 31.9/6.54 | 35/6.51 | 201 | 7  | MS/MS |
| 45                                | aldose reductase-related<br>protein                                               | <i>Bromus inermis</i>              | 167113    | 36.1/6.28 | 37/6.7  | 309 | 11 | MS/MS |
| 67                                | Os01g0743500                                                                      | <i>Oryza sativa Japonica Group</i> | 115439879 | 64.6/6.5  | 65/6.15 | 141 | 8  | MS/MS |
| <b>Detoxification and defense</b> |                                                                                   |                                    |           |           |         |     |    |       |
| 20                                | peroxidase 1                                                                      | <i>Triticum aestivum</i>           | 22001285  | 39.3/8.14 | 38/7.25 | 416 | 13 | MS/MS |
| 40                                | peroxidase 1                                                                      | <i>Triticum aestivum</i>           | 22001285  | 39.3/8.14 | 38/7.67 | 235 | 13 | MS/MS |
| 97                                | peroxidase 1                                                                      | <i>Triticum aestivum</i>           | 22001285  | 39.3/8.14 | 38/7.5  | 333 | 16 | MS/MS |
| 114                               | peroxidase 1                                                                      | <i>Triticum aestivum</i>           | 22001285  | 39.3/8.14 | 39/7.23 | 228 | 12 | MS/MS |
| 35                                | polyphenol oxidase                                                                | <i>Triticum aestivum</i>           | 46946550  | 46.9/5.23 | 57/5.32 | 440 | 17 | MS/MS |
| 14                                | Serpin-Z2B                                                                        | <i>Triticum aestivum</i>           | 75279909  | 43.0/5.18 | 45/5.11 | 862 | 15 | MS/MS |
| 15                                | Serpin-Z2B                                                                        | <i>Triticum aestivum</i>           | 75279909  | 43/5.18   | 45/5.26 | 624 | 14 | MS/MS |
| 72                                | Serpin-Z2B                                                                        | <i>Triticum aestivum</i>           | 75279909  | 43.0/5.18 | 45/5.31 | 235 | 13 | MS/MS |
| 56                                | Catalase isozyme 1                                                                | <i>Hordeum vulgare</i>             | 1705612   | 57.1/6.68 | 54/6.72 | 360 | 15 | MS/MS |
| 66                                | Alpha-amylase/trypsin<br>inhibitor CM3                                            | <i>Triticum aestivum</i>           | 123957    | 18.9/7.44 | 14/6.56 | 512 | 7  | MS/MS |
| 136                               | 0.19 dimeric alpha-amylase<br>inhibitor                                           | <i>Triticum aestivum</i>           | 56480630  | 13.8/5.23 | 13/5.43 | 620 | 9  | MS/MS |

Table S1. Cont.

|                        |                                                                                   |                                       |           |           |         |     |    |       |
|------------------------|-----------------------------------------------------------------------------------|---------------------------------------|-----------|-----------|---------|-----|----|-------|
| 138                    | Endogenous alpha-amylase/<br>subtilisin inhibitor                                 | <i>Tricum aestivum</i>                | 12397     | 19.8/6.77 | 34/6.86 | 823 | 19 | MS/MS |
| 55                     | Os05g0453700                                                                      | <i>Oryza sativa Japonica Group</i>    | 115464233 | 18.1/6.29 | 18/6.41 | 79  | 5  | MS/MS |
| 29                     | Os07g0683900                                                                      | <i>Oryza sativa Japonica Group</i>    | 115474137 | 39.0/6.81 | 38/6.51 | 141 | 6  | MS/MS |
| 9                      | Ascorbate peroxidase                                                              | <i>Triticum aestivum</i>              | 3688398   | 30/5.84   | 27/5.85 | 91  | 11 | MS    |
| 37                     | Ascorbate peroxidase                                                              | <i>Triticum aestivum</i>              | 15808779  | 29/6.04   | 27/5.15 | 103 | 2  | MS    |
| 16                     | Group 3 late embryogenesis<br>abunelate protein                                   | <i>Triticum aestivum</i>              | 170692    | 33/5.01   | 77/6.10 | 164 | 4  | MS    |
| 60                     | Group 3 late embryogenesis<br>abunelate protein (LEA)                             | <i>Triticum aestivum</i>              | 21637     | 82/6.19   | 23/8.81 | 74  | 3  | MS    |
| 113                    | LEA protein                                                                       | <i>Triticum turgidum subsp. Durum</i> | 48093951  | 77/6.17   | 22/9.22 | 135 | 5  | MS    |
| 30                     | putative r40c2 protein                                                            | <i>Oryza sativa Japonica Group</i>    | 34394518  | 32.3/6.89 | 38/6.58 | 213 | 7  | MS/MS |
| 46                     | BAC19.13                                                                          | <i>Solanum lycopersicum</i>           | 9858781   | 59.7/4.98 | 66/5.59 | 76  | 4  | MS/MS |
| 100                    | Basic endochitinase C                                                             | <i>Secale cereale</i>                 | 75262903  | 28.7/8.82 | 28/7.51 | 296 | 6  | MS/MS |
| 99                     | Chain A, Crystal Structure<br>Of Xylanase Inhibitor<br>Protein (Xip-I) From Wheat | <i>Triticum aestivum</i>              | 31615809  | 30.5/8.27 | 29/7.67 | 407 | 13 | MS/MS |
| <b>Storage protein</b> |                                                                                   |                                       |           |           |         |     |    |       |
| 24                     | embryo globulin                                                                   | <i>Hordeum vulgare subsp. vulgare</i> | 167004    | 72.6/6.8  | 65/6.58 | 198 | 16 | MS/MS |
| 32                     | embryo globulin                                                                   | <i>Hordeum vulgare subsp. vulgare</i> | 167004    | 72.6/6.8  | 66/6.67 | 237 | 15 | MS/MS |
| 57                     | embryo globulin                                                                   | <i>Hordeum vulgare subsp. vulgare</i> | 167004    | 72.6/6.8  | 72/6.81 | 189 | 10 | MS    |
| 78                     | embryo globulin                                                                   | <i>Hordeum vulgare subsp. vulgare</i> | 167004    | 72.6/6.8  | 56/6.83 | 173 | 13 | MS/MS |
| 79                     | embryo globulin                                                                   | <i>Hordeum vulgare subsp. vulgare</i> | 167004    | 72.6/6.8  | 55/7.02 | 234 | 15 | MS/MS |
| 80                     | embryo globulin                                                                   | <i>Hordeum vulgare subsp. vulgare</i> | 167004    | 72.6/6.8  | 55/7.21 | 202 | 12 | MS/MS |
| 81                     | embryo globulin                                                                   | <i>Hordeum vulgare subsp. vulgare</i> | 167004    | 72.6/6.8  | 54/7.27 | 154 | 11 | MS/MS |
| 82                     | embryo globulin                                                                   | <i>Hordeum vulgare subsp. vulgare</i> | 167004    | 72.6/6.8  | 67/6.77 | 196 | 12 | MS/MS |
| 86                     | embryo globulin                                                                   | <i>Hordeum vulgare subsp. vulgare</i> | 167004    | 72.6/6.8  | 54/7.54 | 218 | 13 | MS/MS |

Table S1. Cont.

|                            |                                                               |                                    |           |           |         |     |    |       |
|----------------------------|---------------------------------------------------------------|------------------------------------|-----------|-----------|---------|-----|----|-------|
| 61                         | triticin precursor                                            | <i>Triticum aestivum</i>           | 7548844   | 57.3/9.37 | 42/6.87 | 88  | 7  | MS/MS |
| 101                        | triticin precursor                                            | <i>triticin precursor</i>          | 7548844   | 57.3/9.37 | 28/7.61 | 624 | 12 | MS/MS |
| 130                        | triticin precursor                                            | <i>Triticum aestivum</i>           | 7548844   | 57.3/9.37 | 51/6.46 | 759 | 14 | MS/MS |
| 131                        | triticin precursor                                            | <i>Triticum aestivum</i>           | 7548844   | 57.3/9.37 | 49/6.37 | 821 | 15 | MS/MS |
| 132                        | triticin precursor                                            | <i>Triticum aestivum</i>           | 7548844   | 57.3/9.37 | 49/6.46 | 823 | 17 | MS/MS |
| 133                        | triticin precursor                                            | <i>Triticum aestivum</i>           | 7548844   | 57.3/9.37 | 46/6.60 | 510 | 12 | MS/MS |
| 39                         | globulin 3B                                                   | <i>Triticum aestivum</i>           | 215398472 | 57.1/7.36 | 18/5.57 | 139 | 8  | MS/MS |
| 49                         | globulin 3                                                    | <i>Triticum aestivum</i>           | 215398470 | 66.7/7.78 | 18/6.66 | 330 | 9  | MS/MS |
| 50                         | globulin 3                                                    | <i>Triticum aestivum</i>           | 215398470 | 66.7/7.78 | 18/6.78 | 312 | 8  | MS/MS |
| 89                         | globulin 3                                                    | <i>Triticum aestivum</i>           | 215398470 | 66.7/7.78 | 19/5.28 | 368 | 11 | MS/MS |
| 90                         | globulin 3                                                    | <i>Triticum aestivum</i>           | 215398470 | 66.7/7.78 | 18/6.14 | 218 | 10 | MS/MS |
| 64                         | avenin-like protein                                           | <i>Triticum aestivum</i>           | 145321072 | 33.7/8.29 | 33/6.83 | 324 | 5  | MS/MS |
| <b>Photosynthesis</b>      |                                                               |                                    |           |           |         |     |    |       |
| 28                         | 23kDa polypeptide of photosystem II                           | <i>Oryza sativa Japonica Group</i> | 2570499   | 27.2/9.06 | 26/5.78 | 85  | 6  | MS/MS |
| 3                          | Rubulose-1,5-bisphosphate carboxylase/oxygenase large subunit | <i>Psathyrostachys huashanica</i>  | 51859667  | 53/6.35   | 52/6.13 | 128 | 17 | MS    |
| 51                         | putative oxygen-evolving enhancer protein 1                   | <i>Oryza sativa Japonica Group</i> | 109892873 | 37/4.8    | 36/8.80 | 100 | 2  | MS    |
| 83                         | Rubulose-1,5-bisphosphate carboxylase/oxygenase small subunit | <i>Triticum aestivum</i>           | 11990893  | 15/6.01   | 19/9.06 | 110 | 12 | MS    |
| <b>Nitrogen Metabolism</b> |                                                               |                                    |           |           |         |     |    |       |
| 69                         | NAD-dependent formate dehydrogenase                           | <i>Hordeum vulgare</i>             | 21263612  | 41.7/6.9  | 46/6.18 | 286 | 11 | MS/MS |
| 102                        | Os01g0760600                                                  | <i>Oryza sativa Japonica Group</i> | 115440075 | 50.1/8.61 | 46/6.71 | 350 | 10 | MS/MS |

Table S1. Cont.

|                                           |                                                    |                                       |           |           |         |      |    |       |
|-------------------------------------------|----------------------------------------------------|---------------------------------------|-----------|-----------|---------|------|----|-------|
| 135                                       | Os01g0760600                                       | <i>Oryza sativa Japonica Group</i>    | 115440075 | 50.7/8.61 | 49/6.72 | 188  | 9  | MS/MS |
| 23                                        | Os05g0573700                                       | <i>Oryza sativa Japonica Group</i>    | 115465569 | 62.7/6.01 | 59/5.67 | 291  | 9  | MS/MS |
| <b>Protein synthesis/Assembly/Degrade</b> |                                                    |                                       |           |           |         |      |    |       |
| 53                                        | glutamine synthetase isoform GSR1                  | <i>Triticum aestivum</i>              | 40317416  | 39.0/5.35 | 44/5.36 | 457  | 12 | MS/MS |
| 59                                        | putative proteasome subunit alpha type 3           | <i>Oryza sativa Japonica Group</i>    | 50080306  | 27.5/5.76 | 29/5.90 | 238  | 10 | MS/MS |
| 58                                        | annexin2                                           | <i>Zea mays</i>                       | 162459661 | 35.5/6.82 | 34/6.70 | 118  | 7  | MS/MS |
| 13                                        | sequence 5 from patent US 5668007                  |                                       | 2492077   | 19/6.68   | 19/6.77 | 189  | 3  | MS    |
| 47                                        | type I small heat shock protein 17.7 kDa I2Isoform | <i>Solanum lycopersicum</i>           | 24954801  | 18/5.52   | 17/5.58 | 203  | 1  | MS    |
| 110                                       | cytosolic heat shock protein 90                    | <i>Hordeum vulgare</i>                | 32765549  | 80/5.10   | 80/4.96 | 219  | 29 | MS    |
| <b>ATP Interconversion</b>                |                                                    |                                       |           |           |         |      |    |       |
| 11                                        | atp1                                               | <i>Triticum aestivum</i>              | 81176509  | 55.6/5.7  | 54/5.78 | 195  | 15 | MS/MS |
| 74                                        | Nucleoside diphosphate kinase                      | <i>Lolium perenne</i>                 | 9652119   | 15/6.36   | 16/6.3  | 192  | 3  | MS    |
| <b>Chaperones</b>                         |                                                    |                                       |           |           |         |      |    |       |
| 1                                         | HSP70                                              | <i>Hordeum vulgare subsp. vulgare</i> | 476003    | 67.1/5.76 | 65/5.36 | 1080 | 34 | MS/MS |
| 31                                        | HSP70                                              | <i>Hordeum vulgare subsp. vulgare</i> | 476003    | 67/5.76   | 67/5.24 | 170  | 12 | MS    |
| 10                                        | cyclophilin-like protein                           | <i>Triticum aestivum</i>              | 37788308  | 26.1/9.4  | 19/6.97 | 260  | 10 | MS/MS |
| <b>Signal Transduction</b>                |                                                    |                                       |           |           |         |      |    |       |
| 8                                         | G beta-like protein                                | <i>Glycine max</i>                    | 1256608   | 35/7.62   | 37/5.97 | 75   | 1  | MS/MS |
| 26                                        | WD-40 repeat protein                               | <i>Arabidopsis thaliana</i>           | 21594513  | 34/4.68   | 35/7.62 | 75   | 1  | MS    |

Table S1. Cont.

| Transporting-associated proteins |                                     |                                                   |           |           |         |     |    |       |
|----------------------------------|-------------------------------------|---------------------------------------------------|-----------|-----------|---------|-----|----|-------|
| 2                                | ATP-dependent RNA helicase eIF4A    | <i>Zea mays</i>                                   | 1170509   | 47.2/5.31 | 52/5.49 | 815 | 25 | MS/MS |
| unknown                          |                                     |                                                   |           |           |         |     |    |       |
| 36                               | predicted protein                   | <i>Physcomitrella patens</i> subsp. <i>patens</i> | 168046982 | 41.9/5.13 | 48/5.42 | 191 | 11 | MS/MS |
| 91                               | sequence 844 from patent US 6753314 | <i>Oryza sativa</i>                               | 53971832  | 16/6.01   | 65/8.16 | 161 | 17 | MS    |

<sup>a</sup> Theor.Mr/pI: molecular mass of predicted protein/pI of predicted protein; <sup>b</sup> Exp.Mr/pI: molecular mass of protein on the gel/ pI of protein on the gel; <sup>c</sup> Score: statistical probability of true positive identification of the predicted protein calculated by MASCOT with 0.3 peptide tolerance and one allowed missed cleavage (score  $\geq 42$  against NCBIInr,  $\geq 66$  against MSDB, or  $\geq 55$  against Swiss-Prot);

<sup>d</sup> PN: Number of peptides searched by MS and sequenced by MS/MS; <sup>e</sup> Method: MS = MALDI-TOF, MS/MS = MALDI-TOF/TOF.

**Table S2.** Differentially expressed non-prolamins under control and drought stress conditions in Janz and Kauz by nonlinear 2-DE (pH 3–10, 18 cm) and MALDI mass spectrometry.

| Sport ID          | Protein name                                | Plant species                                | Accession No (gi:) | Theor. Mr/pI <sup>a</sup> | Score <sup>b</sup> | PN <sup>c</sup> | Method <sup>d</sup> |
|-------------------|---------------------------------------------|----------------------------------------------|--------------------|---------------------------|--------------------|-----------------|---------------------|
| carbon metabolism |                                             |                                              |                    |                           |                    |                 |                     |
| 208               | ADP-glucose pyrophosphorylase large subunit | <i>Triticum aestivum</i>                     | 32812836           | 58.4/5.89                 | 477                | 22              | MS/MS               |
| 209               | ADP-glucose pyrophosphorylase large subunit | <i>Triticum aestivum</i>                     | 32812836           | 58.4/5.89                 | 972                | 28              | MS/MS               |
| 214               | beta amylase                                | <i>Triticum aestivum</i>                     | 32400764           | 31.1/8.6                  | 567                | 13              | MS/MS               |
| 303               | aestivum stearyl-ACP desaturase             | <i>Triticum aestivum</i>                     | 319739540          | 44.7/8.15                 | 453                | 16              | MS/MS               |
| 304               | beta amylase                                | <i>Triticum aestivum</i>                     | 32400764           | 31.1/8.6                  | 434                | 13              | MS/MS               |
| 310               | UDP-glucose pyrophosphorylase               | <i>Hordeum vulgare</i>                       | 6136111            | 51.8/5.2                  | 1,110              | 27              | MS/MS               |
| 311               | sucrose synthase type 2                     | <i>Triticum aestivum</i>                     | 3393044            | 93.1/6.17                 | 809                | 31              | MS/MS               |
| 312               | sucrose synthase type 2                     | <i>Triticum aestivum</i>                     | 3393044            | 93.1/6.17                 | 636                | 31              | MS/MS               |
| 316               | alpha-galactosidase                         | <i>Hordeum vulgare</i> subsp. <i>vulgare</i> | 2204226            | 22.2/6.4                  | 125                | 7               | MS/MS               |
| 320               | triosephosphat-isomerase                    | <i>Triticum aestivum</i>                     | 11124572           | 27/5.38                   | 642                | 14              | MS/MS               |

Table S2. Cont.

|                                   |                                                                  |                                                 |           |           |       |    |       |
|-----------------------------------|------------------------------------------------------------------|-------------------------------------------------|-----------|-----------|-------|----|-------|
| 325                               | phosphoglucosyltransferase                                       | <i>Triticum aestivum</i>                        | 18076790  | 63/5.66   | 650   | 26 | MS/MS |
| 327                               | beta amylase                                                     | <i>Triticum aestivum</i>                        | 32400764  | 31.1/8.6  | 474   | 15 | MS/MS |
| 331                               | tissue-ubiquitous beta-amylase 2                                 | <i>Sorghum bicolor</i>                          | 61006859  | 57.3/5.46 | 155   | 6  | MS/MS |
| <b>Detoxification and defense</b> |                                                                  |                                                 |           |           |       |    |       |
| 319                               | ascorbate peroxidase                                             | <i>Hordeum vulgare subsp. vulgare</i>           | 15808779  | 28/5.1    | 520   | 11 | MS/MS |
| 322                               | serpin 1                                                         | <i>Triticum aestivum</i>                        | 224589266 | 43.3/5.44 | 985   | 18 | MS/MS |
| 323                               | Serpin-Z1C                                                       | <i>Triticum aestivum</i>                        | 75313848  | 43/5.62   | 325   | 11 | MS/MS |
| 314                               | Alpha-amylase/trypsin inhibitor CM3;                             | <i>Triticum aestivum</i>                        | 123957    | 18.9/5.62 | 614   | 8  | MS/MS |
| 334                               | dehydroascorbate reductase                                       | <i>Triticum aestivum</i>                        | 28192421  | 23.5/5.88 | 812   | 15 | MS/MS |
| <b>Photosynthesis</b>             |                                                                  |                                                 |           |           |       |    |       |
| 201                               | ribulose-1,5-bisphosphate<br>carboxylase/oxygenase large subunit | <i>Hordeum erectifolium</i>                     | 31087877  | 53.3/6.13 | 557   | 25 | MS/MS |
| 202                               | ribulose-1,5-bisphosphate<br>carboxylase/oxygenase large subunit | <i>Hordeum patagonicum subsp. santacrucense</i> | 31087891  | 53.4/5.95 | 839   | 31 | MS/MS |
| 210                               | Os01g0328700                                                     | <i>Oryza sativa Japonica Group</i>              | 115436320 | 53.0/7.21 | 257   | 13 | MS/MS |
| 313                               | ribulose-1,5-bisphosphate<br>carboxylase/oxygenase large subunit | <i>Triticum aestivum</i>                        | 14017580  | 53.4/6.22 | 311   | 18 | MS/MS |
| <b>Nitrogen Metabolism</b>        |                                                                  |                                                 |           |           |       |    |       |
| 203                               | Alanine aminotransferase 2                                       | <i>Hordeum vulgare</i>                          | 1703227   | 53.4/5.93 | 567   | 21 | MS/MS |
| 213                               | Alanine aminotransferase 2                                       | <i>Hordeum vulgare</i>                          | 1703227   | 53.4/5.93 | 608   | 23 | MS/MS |
| 324                               | methionine synthase 1 enzyme                                     | <i>Hordeum vulgare</i>                          | 68655495  | 84.9/5.74 | 483   | 17 | MS/MS |
| <b>ATP Interconversion</b>        |                                                                  |                                                 |           |           |       |    |       |
| 301                               | F0-F1 ATPase alpha subunit                                       | <i>Sorghum bicolor</i>                          | 9408184   | 47.8/5.96 | 1,080 | 22 | MS/MS |
| 329                               | ATP synthase CF1 alpha subunit                                   | <i>Triticum aestivum</i>                        | 14017569  | 55.3/6.11 | 1,290 | 32 | MS/MS |
| <b>Signal Transduction</b>        |                                                                  |                                                 |           |           |       |    |       |
| 204                               | Os04g0118400                                                     | <i>Oryza sativa Japonica Group</i>              | 115456914 | 94.9/5.85 | 252   | 19 | MS/MS |

Table S2. Cont.

| Unknown |                                              |                                       |           |           |     |    |       |
|---------|----------------------------------------------|---------------------------------------|-----------|-----------|-----|----|-------|
| 205     | Os06g0247500                                 | <i>Oryza sativa Japonica Group</i>    | 115467370 | 61.9/6.01 | 78  | 6  | MS/MS |
| 317     | predicted protein                            | <i>Hordeum vulgare subsp. vulgare</i> | 326496084 | 36.7/6.06 | 538 | 14 | MS/MS |
| 318     | predicted protein                            | <i>Hordeum vulgare subsp. vulgare</i> | 326497973 | 39.1/6.27 | 428 | 13 | MS/MS |
| 315     | predicted protein                            | <i>Hordeum vulgare subsp. vulgare</i> | 326510251 | 86.1/5.81 | 532 | 26 | MS/MS |
| 328     | predicted protein                            | <i>Hordeum vulgare subsp. vulgare</i> | 326503994 | 68.8/6.08 | 442 | 16 | MS/MS |
| 332     | predicted protein                            | <i>Hordeum vulgare subsp. vulgare</i> | 326493416 | 32.8/5.34 | 194 | 14 | MS/MS |
| 330     | hypothetical protein<br>SORBIDRAFT_02g029260 | <i>Sorghum bicolor</i>                | 242049776 | 24.7/6.43 | 290 | 12 | MS/MS |

<sup>a</sup> Theor.Mr/pI: molecular mass of predicted protein/ pI of predicted protein; <sup>b</sup> Score: statistical probability of true positive identification of the predicted protein calculated by MASCOT with 0.3 peptide tolerance and one allowed missed cleavage; (score  $\geq 42$  against NCBItr,  $\geq 66$  against MSDB, or  $\geq 55$  against Swiss-Prot). <sup>c</sup> PN: Number of peptides sequenced. <sup>d</sup> Method: MS = MALDI-TOF, MS/MS = MALDI-TOF/TOF.

Table S3. Peptide sequences of identified proteins by MALDI-TOF-TOF MS.

| Spot ID | Protein name                    | Calc.<br>mass <sup>a)</sup> | Observ.<br>mass <sup>b)</sup> | $\pm$ da | $\pm$ ppm | Start<br>seq. <sup>c</sup> | End<br>seq. <sup>d</sup> | Sequences <sup>e</sup> | Ion<br>score <sup>f</sup> | C.I. % |
|---------|---------------------------------|-----------------------------|-------------------------------|----------|-----------|----------------------------|--------------------------|------------------------|---------------------------|--------|
| 1       | HSP70                           | 998.5013                    | 998.5214                      | 0.0201   | 20        | 86                         | 94                       | NQAAVNPER              | 60                        | 99.94  |
|         |                                 | 1052.5596                   | 1052.5812                     | 0.0216   | 21        | 302                        | 310                      | ALSNQHQVR              | 40                        | 94.275 |
|         |                                 | 1155.6481                   | 1155.6659                     | 0.0178   | 15        | 190                        | 201                      | DAGVIAGLNVAR           | 92                        | 100    |
|         |                                 | 1464.7118                   | 1464.7228                     | 0.011    | 8         | 66                         | 78                       | ITPSWVGFTDGER          | 104                       | 100    |
|         |                                 | 1509.8384                   | 1509.8431                     | 0.0047   | 3         | 358                        | 371                      | TQIHEIVLVGGSTR         | 111                       | 100    |
|         |                                 | 1536.7513                   | 1536.7633                     | 0.012    | 8         | 52                         | 65                       | NGHVEIANDQGGR          | 102                       | 100    |
|         |                                 | 1815.9963                   | 1815.9972                     | 0.0009   | 0         | 202                        | 218                      | IINEPTAAAIAYGLDKR      | 138                       | 100    |
|         |                                 | 1892.9502                   | 1892.9502                     | 0        | 0         | 169                        | 185                      | INDAVVTVPAYFNDAQR      | 128                       | 100    |
| 2       | ATPdependent RNA helicase eIF4A | 976.5574                    | 976.5557                      | -0.0017  | -2        | 378                        | 386                      | GVAINFVTR              | 46                        | 97.943 |
|         |                                 | 1070.5953                   | 1070.5948                     | -0.0005  | 0         | 177                        | 185                      | QSLRPDNIK              | 41                        | 93.189 |
|         |                                 | 1104.6525                   | 1104.6489                     | -0.0036  | -3        | 377                        | 386                      | KGVAINFVTR             | 59                        | 99.896 |

Table S3. *Cont.*

|    |                                                          |           |           |         |     |     |     |                     |     |        |
|----|----------------------------------------------------------|-----------|-----------|---------|-----|-----|-----|---------------------|-----|--------|
| 7  | cytosolic glyceraldehyde-3-phosphate dehydrogenase GAPDH | 1114.6831 | 1114.6849 | 0.0018  | 2   | 333 | 342 | VLITTDLLAR          | 75  | 99.998 |
|    |                                                          | 1142.5736 | 1142.5763 | 0.0027  | 2   | 140 | 150 | VHACVGGTSVR         | 89  | 100    |
|    |                                                          | 1173.6475 | 1173.6442 | -0.0033 | -3  | 246 | 255 | RDELTLEGIK          | 54  | 99.707 |
|    |                                                          | 1461.8538 | 1461.8485 | -0.0053 | -4  | 155 | 169 | ILASGVHVVVGTPGR     | 75  | 99.998 |
|    |                                                          | 1827.9388 | 1827.9368 | -0.002  | -1  | 55  | 70  | GIYAYGF EKPSAIQQR   | 120 | 100    |
|    |                                                          | 1184.6423 | 1184.6376 | -0.0047 | -4  | 199 | 209 | AGIALNDHFVK         | 59  | 99.9   |
|    |                                                          | 1247.6995 | 1247.6683 | -0.0312 | -25 | 149 | 159 | LAKPATYDQIK         | 41  | 93.347 |
| 8  | Os01g0686800                                             | 1498.8477 | 1498.8447 | -0.003  | -2  | 135 | 148 | VPTVDVSVDLTVR       | 121 | 100    |
|    |                                                          | 2213.0356 | 2213.0701 | 0.0345  | 16  | 172 | 191 | GILGYVDEDLVSTDFQGD  | 64  | 99.967 |
|    |                                                          | 1034.5088 | 1034.5034 | -0.0054 | -5  | 193 | 200 | VWNLTNCK            | 41  | 95.184 |
| 10 | cyclophilin-like protein                                 | 1248.6583 | 1248.6569 | -0.0014 | -1  | 101 | 111 | LWDLSTGVTTTR        | 79  | 100    |
|    |                                                          | 844.4312  | 844.4391  | 0.0079  | 9   | 196 | 202 | TPWLDGR             | 28  | 11.499 |
|    |                                                          | 1590.7719 | 1590.7672 | -0.0047 | -3  | 218 | 231 | TIESSETDRGDRPK      | 33  | 67.495 |
| 11 | atp1                                                     | 2035.0496 | 2035.0465 | -0.0031 | -2  | 97  | 114 | IVIGLYGDDVPQTVENFR  | 114 | 100    |
|    |                                                          | 1203.658  | 1203.6624 | 0.0044  | 4   | 7   | 17  | AAELTTLLESR         | 44  | 97.303 |
|    |                                                          | 925.5214  | 925.5243  | 0.0029  | 3   | 11  | 18  | LSIAHQTR            | 56  | 99.83  |
| 14 | Serpín-Z2B                                               | 1137.6667 | 1137.6603 | -0.0064 | -6  | 172 | 181 | LVLGNALYFK          | 71  | 99.995 |
|    |                                                          | 1192.5382 | 1192.5344 | -0.0038 | -3  | 182 | 191 | GAWTDQFDPR          | 69  | 99.992 |
|    |                                                          | 1372.7068 | 1372.7004 | -0.0064 | -5  | 159 | 171 | DILPAGSIDNTTR       | 86  | 100    |
|    |                                                          | 1514.7485 | 1514.7402 | -0.0083 | -5  | 125 | 137 | YKAEAQSVDFQTK       | 100 | 100    |
|    |                                                          | 1665.8595 | 1665.851  | -0.0085 | -5  | 261 | 274 | LSAEPEFLEQHPR       | 81  | 100    |
|    |                                                          | 1922.9706 | 1922.975  | 0.0044  | 2   | 335 | 353 | AFVEVNETGTEAAATTIA  | 143 | 100    |
|    |                                                          | 2085.155  | 2085.146  | -0.009  | -4  | 152 | 171 | VTTGLIKDILPAGSIDNTT | 138 | 100    |
| 15 | Serpín-Z2B                                               | 925.5214  | 925.5187  | -0.0027 | -3  | 11  | 18  | LSIAHQTR            | 48  | 98.903 |
|    |                                                          | 1137.6667 | 1137.6552 | -0.0115 | -10 | 172 | 181 | LVLGNALYFK          | 38  | 88.377 |
|    |                                                          | 1192.5382 | 1192.5319 | -0.0063 | -5  | 182 | 191 | GAWTDQFDPR          | 57  | 99.864 |
|    |                                                          | 1514.7485 | 1514.7379 | -0.0106 | -7  | 125 | 137 | YKAEAQSVDFQTK       | 77  | 99.999 |

Table S3. *Cont.*

|    |                                     |           |           |         |    |     |     |                    |     |        |
|----|-------------------------------------|-----------|-----------|---------|----|-----|-----|--------------------|-----|--------|
| 20 | peroxidase 1                        | 1665.8595 | 1665.8508 | -0.0087 | -5 | 261 | 274 | LSAEPEFLEQHIPR     | 97  | 100    |
|    |                                     | 1922.9706 | 1922.974  | 0.0034  | 2  | 335 | 353 | AFVEVNETGTEAAATTIA | 112 | 100    |
|    |                                     | 2085.155  | 2085.1526 | -0.0024 | -1 | 152 | 171 | VTGLIKDILPAGSIDNTT | 85  | 100    |
|    |                                     | 958.5064  | 958.5092  | 0.0028  | 3  | 113 | 120 | AVNDIRDR           | 32  | 47.438 |
|    |                                     | 998.5992  | 998.5987  | -0.0005 | -1 | 62  | 71  | DIGLAAGLLR         | 77  | 99.998 |
|    |                                     | 1004.4836 | 1004.4828 | -0.0008 | -1 | 34  | 41  | GLSFDFYR           | 35  | 75.696 |
|    |                                     | 1486.8047 | 1486.7958 | -0.0089 | -6 | 127 | 141 | GAVVSCADILALAAR    | 114 | 100    |
| 22 | beta amylase                        | 1772.9291 | 1772.9222 | -0.0069 | -4 | 142 | 158 | DSVVVSGGPDYRVPLGR  | 63  | 99.962 |
|    |                                     | 1006.554  | 1006.5618 | 0.0078  | 8  | 211 | 219 | NARPHGINK          | 48  | 99.062 |
|    |                                     | 1326.6688 | 1326.6703 | 0.0015  | 1  | 200 | 210 | YDPTAYNTILR        | 91  | 100    |
| 23 | Os05g0573700                        | 1646.781  | 1646.7743 | -0.0067 | -4 | 61  | 74  | FFVDNGTYLTEQGR     | 88  | 100    |
|    |                                     | 1372.7219 | 1372.7213 | -0.0006 | 0  | 80  | 91  | VSLAGHEEYIVR       | 89  | 100    |
|    |                                     | 1528.6884 | 1528.692  | 0.0036  | 2  | 491 | 504 | GVAFMVDNCSTTAR     | 108 | 100    |
| 24 | embryo globulin                     | 1544.6832 | 1544.6931 | 0.0099  | 6  | 491 | 504 | GVAFMVDNCSTTAR     | 35  | 79.084 |
|    |                                     | 991.5472  | 991.5861  | 0.0389  | 39 | 181 | 188 | RPYVFGPR           | 63  | 99.966 |
|    |                                     | 1028.5558 | 1028.5962 | 0.0404  | 39 | 222 | 230 | VAIMEVNPR          | 57  | 99.866 |
| 27 | cytoplasmic aldolase                | 829.3839  | 829.3916  | 0.0077  | 9  | 133 | 139 | YYEAGAR            | 45  | 97.899 |
|    |                                     | 1346.7314 | 1346.7264 | -0.005  | -4 | 238 | 249 | VAPEVIAEYTVR       | 87  | 100    |
|    |                                     | 1474.8264 | 1474.8239 | -0.0025 | -2 | 237 | 249 | KVAPEVIAEYTVR      | 77  | 99.999 |
|    |                                     | 1488.8016 | 1488.7985 | -0.0031 | -2 | 25  | 39  | GILAADESTGTIGKR    | 77  | 99.999 |
|    |                                     | 1662.8195 | 1662.8169 | -0.0026 | -2 | 40  | 53  | FASINVENVEDNRR     | 40  | 94.106 |
| 28 | 23kDa polypeptide of photosystem II | 945.5152  | 945.5126  | -0.0026 | -3 | 109 | 116 | EFPGQVLR           | 50  | 99.405 |
| 29 | Os07g0683900                        | 1047.5331 | 1047.5349 | 0.0018  | 2  | 260 | 269 | HSTGQGHVPK         | 40  | 92.813 |
|    |                                     | 1064.4215 | 1064.4219 | 0.0004  | 0  | 330 | 337 | WCEGDNQR           | 37  | 86.586 |
|    |                                     | 1089.5801 | 1089.5796 | -0.0005 | 0  | 87  | 96  | HSLGQSHVPK         | 37  | 85.626 |
| 30 | putative r40c2 protein              | 1064.4215 | 1064.4224 | 0.0009  | 1  | 272 | 279 | WCEGDNQR           | 37  | 87.271 |
|    |                                     | 1089.5801 | 1089.5813 | 0.0012  | 1  | 29  | 38  | HSLGQSHVPK         | 53  | 99.649 |
|    |                                     | 1721.8857 | 1721.9185 | 0.0328  | 19 | 180 | 194 | IRDEEGYPAFALVNK    | 86  | 100    |

Table S3. *Cont.*

|    |                                                |           |           |         |     |     |     |                    |     |        |
|----|------------------------------------------------|-----------|-----------|---------|-----|-----|-----|--------------------|-----|--------|
| 32 | embryo globulin                                | 991.5472  | 991.5847  | 0.0375  | 38  | 181 | 188 | RPYVFGPR           | 66  | 99.981 |
|    |                                                | 1028.5558 | 1028.592  | 0.0362  | 35  | 222 | 230 | VAIMEVNPR          | 44  | 97.146 |
|    |                                                | 1269.6117 | 1269.6616 | 0.0499  | 39  | 37  | 47  | GGHSLQQCVQR        | 63  | 99.962 |
| 33 | beta amylase                                   | 1006.554  | 1006.5599 | 0.0059  | 6   | 211 | 219 | NARPHGINK          | 53  | 99.656 |
|    |                                                | 1326.6688 | 1326.6676 | -0.0012 | -1  | 200 | 210 | YDPTAYNTILR        | 75  | 99.998 |
|    |                                                | 1474.6777 | 1474.674  | -0.0037 | -3  | 187 | 199 | EGLNMACENALPR      | 88  | 100    |
|    |                                                | 1646.781  | 1646.7755 | -0.0055 | -3  | 61  | 74  | FFVDNGTYLTEQGR     | 98  | 100    |
| 35 | polyphenol oxidase                             | 966.4526  | 966.4545  | 0.0019  | 2   | 80  | 87  | SSPLYDER           | 45  | 97.827 |
|    |                                                | 1207.6833 | 1207.6831 | -0.0002 | 0   | 133 | 142 | TLLFLGQPYR         | 31  | 44.406 |
|    |                                                | 1285.6682 | 1285.6654 | -0.0028 | -2  | 237 | 247 | VRDCLDPAALR        | 40  | 93.675 |
|    |                                                | 2156.1194 | 2156.1245 | 0.0051  | 2   | 265 | 287 | ASGGTPAPATTGTLPATL | 162 | 100    |
| 36 | predicted protein                              | 976.4483  | 976.4512  | 0.0029  | 3   | 22  | 31  | AGFAGDDAPR         | 62  | 99.953 |
|    |                                                | 1132.527  | 1132.5308 | 0.0038  | 3   | 200 | 209 | GYSFTTTAER         | 45  | 97.571 |
| 38 | small subunit ADP glucose<br>pyrophosphorylase | 900.5261  | 900.5289  | 0.0028  | 3   | 422 | 429 | AIIDKNAR           | 29  | 21.449 |
|    |                                                | 1017.5952 | 1017.5916 | -0.0036 | -4  | 366 | 374 | IHHSVVGRL          | 69  | 99.993 |
|    |                                                | 1032.5472 | 1032.549  | 0.0018  | 2   | 330 | 338 | SAPIYTQPR          | 62  | 99.965 |
|    |                                                | 1103.5845 | 1103.5834 | -0.0011 | -1  | 9   | 18  | TFPSPSPSKR         | 39  | 92.753 |
|    |                                                | 1256.7109 | 1256.7067 | -0.0042 | -3  | 64  | 75  | AKPAVPLGANYR       | 49  | 99.17  |
|    |                                                | 1621.7925 | 1621.7861 | -0.0064 | -4  | 228 | 242 | AMMVDTTILGLDDAR    | 64  | 99.978 |
| 39 | globulin 3B                                    | 2089.9058 | 2089.894  | -0.0118 | -6  | 461 | 478 | DQQDEGFVAGPEQQEQ   | 105 | 100    |
| 40 | peroxidase 1                                   | 998.5992  | 998.5756  | -0.0236 | -24 | 62  | 71  | DIGLAAGLLR         | 61  | 99.939 |
|    |                                                | 1486.8047 | 1486.7577 | -0.047  | -32 | 127 | 141 | GAVVSCADILALAAR    | 81  | 100    |
| 45 | aldose reductase-related protein               | 1061.5408 | 1061.5392 | -0.0016 | -2  | 72  | 81  | AAMEAGIDRK         | 56  | 99.823 |
|    |                                                | 1121.595  | 1121.5883 | -0.0067 | -6  | 223 | 232 | NLAHDPVVEK         | 43  | 96.803 |
|    |                                                | 1934.9203 | 1934.9127 | -0.0076 | -4  | 34  | 52  | AGSDTAHSVQTAITEAGY | 138 | 100    |
| 46 | BAC19.13                                       | 1245.6475 | 1245.6433 | -0.0042 | -3  | 151 | 161 | VEEGDVFFVPR        | 65  | 99.975 |

Table S3. *Cont.*

|    |                                                    |           |           |         |    |     |     |                    |     |        |
|----|----------------------------------------------------|-----------|-----------|---------|----|-----|-----|--------------------|-----|--------|
| 49 | globulin 3                                         | 1822.8752 | 1822.8661 | -0.0091 | -5 | 489 | 504 | GSSNLQVVCFEINAER   | 127 | 100    |
|    |                                                    | 1906.0182 | 1906.0131 | -0.0051 | -3 | 470 | 488 | GSAFVPPGHPVVEIASS  | 113 | 100    |
|    |                                                    | 2222.0618 | 2222.0579 | -0.0039 | -2 | 489 | 507 | GSSNLQVVCFEINAERNE | 47  | 99.96  |
| 50 | globulin 3                                         | 1822.8752 | 1822.8713 | -0.0039 | -2 | 489 | 504 | GSSNLQVVCFEINAER   | 118 | 100    |
|    |                                                    | 1906.0182 | 1906.0134 | -0.0048 | -3 | 470 | 488 | GSAFVPPGHPVVEIASS  | 94  | 100    |
|    |                                                    | 2222.0618 | 2222.0667 | 0.0049  | 2  | 489 | 507 | GSSNLQVVCFEINAERNE | 71  | 100    |
| 53 | glutamine synthetase isoform GSr1                  | 960.4785  | 960.4813  | 0.0028  | 3  | 170 | 177 | DIVDAHYK           | 54  | 99.752 |
|    |                                                    | 1440.7693 | 1440.7731 | 0.0038  | 3  | 39  | 52  | TVNGPITDASQLPK     | 97  | 100    |
|    |                                                    | 1552.7251 | 1552.7286 | 0.0035  | 2  | 277 | 290 | HAQHIAAYGEGNER     | 121 | 100    |
|    |                                                    | 1583.7812 | 1583.7775 | -0.0037 | -2 | 292 | 305 | LTGHHETADINTFK     | 89  | 100    |
| 55 | Os05g0453700                                       | 1400.6838 | 1400.682  | -0.0018 | -1 | 13  | 25  | IGVAMDYSASSKR      | 48  | 98.742 |
| 56 | Catalase isozyme 1                                 | 974.5054  | 974.508   | 0.0026  | 3  | 103 | 110 | FSTVVHER           | 68  | 99.988 |
|    |                                                    | 1034.5378 | 1034.5367 | -0.0011 | -1 | 51  | 58  | LAQFDRER           | 31  | 33.49  |
|    |                                                    | 1127.5804 | 1127.5795 | -0.0009 | -1 | 111 | 120 | GSPETLRDPR         | 44  | 97.291 |
|    |                                                    | 1136.6787 | 1136.6774 | -0.0013 | -1 | 92  | 102 | APGVQTPVIVR        | 54  | 99.667 |
| 58 | annexin2                                           | 1773.8767 | 1773.8855 | 0.0088  | 5  | 132 | 147 | SLEEDVAAHVTGDFRK   | 62  | 99.954 |
| 59 | putative proteasome subunit alpha type 3           | 826.4457  | 826.449   | 0.0033  | 4  | 160 | 167 | YFGAALGK           | 42  | 95.126 |
|    |                                                    | 1019.523  | 1019.5229 | -0.0001 | 0  | 102 | 110 | VYGEPMPVK          | 30  | 15.486 |
|    |                                                    | 1040.5411 | 1040.5355 | -0.0056 | -5 | 21  | 29  | VFQVEYAGK          | 38  | 86.971 |
|    |                                                    | 1217.6559 | 1217.6532 | -0.0027 | -2 | 42  | 52  | CKDGIVLGVEK        | 57  | 99.857 |
|    |                                                    | 885.5152  | 885.5184  | 0.0032  | 4  | 50  | 57  | LQASTPLR           | 31  | 23.932 |
| 61 | triticin precursor                                 | 931.4632  | 931.4641  | 0.0009  | 1  | 147 | 153 | FKDEHQK            | 30  | 6.416  |
|    |                                                    | 1201.6536 | 1201.6584 | 0.0048  | 4  | 42  | 54  | VALVTGGDSGIGR      | 56  | 99.848 |
| 63 | glucose and ribitol dehydrogenase homolog - barley | 1711.8246 | 1711.8544 | 0.0298  | 17 | 74  | 88  | GHEDKDAEETLQALR    | 78  | 100    |

Table S3. *Cont.*

|    |                                     |           |           |         |     |     |     |                    |     |        |
|----|-------------------------------------|-----------|-----------|---------|-----|-----|-----|--------------------|-----|--------|
| 64 | avenin-like protein                 | 818.4553  | 818.4599  | 0.0046  | 6   | 248 | 254 | MSLQALR            | 29  | 93.405 |
|    |                                     | 1245.6587 | 1245.661  | 0.0023  | 2   | 202 | 211 | QLSQIPEQFR         | 77  | 100    |
|    |                                     | 1381.7006 | 1381.6985 | -0.0021 | -2  | 212 | 223 | CQAIHNVAEAIR       | 90  | 100    |
|    |                                     | 2925.406  | 2925.4216 | 0.0156  | 5   | 224 | 247 | QQQPQQWQGMYPQ      | 98  | 100    |
| 65 | beta amylase                        | 1006.554  | 1006.5628 | 0.0088  | 9   | 211 | 219 | NARPHGINK          | 33  | 68.243 |
|    |                                     | 1299.582  | 1299.5846 | 0.0026  | 2   | 151 | 161 | ASLNFTCAEMR        | 79  | 100    |
|    |                                     | 1326.6688 | 1326.6726 | 0.0038  | 3   | 200 | 210 | YDPTAYNTILR        | 82  | 100    |
|    |                                     | 1474.6777 | 1474.6779 | 0.0002  | 0   | 187 | 199 | EGLNMACENALPR      | 111 | 100    |
|    |                                     | 1646.781  | 1646.7781 | -0.0029 | -2  | 61  | 74  | FFVDNGTYLTEQGR     | 92  | 100    |
|    |                                     | 1668.7952 | 1668.7903 | -0.0049 | -3  | 33  | 47  | AAAAMVGHPEWEFPR    | 39  | 91.393 |
| 66 | Alpha-amylase/trypsin inhibitor CM3 | 1010.52   | 1010.5317 | 0.0117  | 12  | 37  | 44  | TNLLPHCR           | 47  | 98.828 |
|    |                                     | 1110.5038 | 1110.5115 | 0.0077  | 7   | 133 | 140 | EMQWDFVR           | 67  | 99.987 |
|    |                                     | 1126.4987 | 1126.5039 | 0.0052  | 5   | 133 | 140 | EMQWDFVR           | 49  | 99.247 |
|    |                                     | 1698.9214 | 1698.9071 | -0.0143 | -8  | 101 | 115 | YFIALPVPSQPVDPR    | 64  | 99.977 |
|    |                                     | 1727.8381 | 1727.8246 | -0.0135 | -8  | 116 | 132 | SGNVGESGLIDLPGCPR  | 155 | 100    |
|    |                                     | 1957.8564 | 1957.8285 | -0.0279 | -14 | 81  | 95  | LYCCQELAEISQQCR    | 119 | 100    |
| 67 | Os01g0743500                        | 1315.7217 | 1315.7161 | -0.0056 | -4  | 175 | 186 | SIQVIVVTDGER       | 40  | 93.573 |
|    |                                     | 1539.6606 | 1539.6599 | -0.0007 | 0   | 571 | 582 | YAESCMYSPIYR       | 63  | 99.965 |
| 69 | Formate dehydrogenase               | 817.4526  | 817.4579  | 0.0053  | 6   | 192 | 200 | TVGTVGAGR          | 44  | 97.914 |
|    |                                     | 955.5683  | 955.5684  | 0.0001  | 0   | 275 | 283 | GVHVNAR            | 54  | 99.803 |
|    |                                     | 1209.6124 | 1209.6104 | -0.002  | -2  | 174 | 184 | GEWNVAGIAHR        | 52  | 99.694 |
|    |                                     | 1292.6998 | 1292.6926 | -0.0072 | -6  | 163 | 173 | NFLPGYQQVVK        | 48  | 99.228 |
| 70 | xylose isomerase                    | 1358.7162 | 1358.7085 | -0.0077 | -6  | 416 | 427 | LIEDGSLDELVR       | 78  | 99.999 |
|    |                                     | 1568.7737 | 1568.7596 | -0.0141 | -9  | 235 | 247 | EGYQTLNNTDMKR      | 62  | 99.948 |
|    |                                     | 2672.2053 | 2672.1926 | -0.0127 | -5  | 308 | 330 | INVECNHATLSGHSCHHE | 99  | 100    |

Table S3. *Cont.*

|    |                                                                          |           |           |         |     |     |     |                   |    |        |
|----|--------------------------------------------------------------------------|-----------|-----------|---------|-----|-----|-----|-------------------|----|--------|
| 71 | NADPH producing dehydrogenase of the oxidative pentose phosphate pathway | 1052.5524 | 1052.5527 | 0.0003  | 0   | 26  | 34  | GFPISVYNR         | 39 | 91.251 |
|    |                                                                          | 1064.5735 | 1064.5732 | -0.0003 | 0   | 292 | 300 | FLSGLKDER         | 49 | 99.147 |
|    |                                                                          | 1109.6426 | 1109.6406 | -0.002  | -2  | 441 | 450 | LPANLVQAQR        | 38 | 90.07  |
|    |                                                                          | 1258.5488 | 1258.5476 | -0.0012 | -1  | 451 | 460 | DYFGAHTYER        | 62 | 99.957 |
|    |                                                                          | 1380.7706 | 1380.7668 | -0.0038 | -3  | 439 | 450 | DRLPANLVQAQR      | 48 | 98.836 |
|    |                                                                          | 1665.8265 | 1665.8234 | -0.0031 | -2  | 122 | 138 | GLLYLGMGVSGGEEGAR | 63 | 99.963 |
| 72 | Serpín-Z2B                                                               | 1681.8214 | 1681.8153 | -0.0061 | -4  | 122 | 138 | GLLYLGMGVSGGEEGAR | 44 | 97.5   |
|    |                                                                          | 925.5214  | 925.4877  | -0.0337 | -36 | 11  | 18  | LSIAHQTR          | 32 | 80.575 |
|    |                                                                          | 1514.7485 | 1514.6855 | -0.063  | -42 | 125 | 137 | YKAEAQSVDFQTK     | 90 | 100    |
| 78 | embryo globulin                                                          | 1028.5558 | 1028.5631 | 0.0073  | 7   | 222 | 230 | VAIMEVNPR         | 57 | 99.838 |
|    |                                                                          | 1360.7219 | 1360.72   | -0.0019 | -1  | 387 | 397 | DTFNLLEQRPK       | 60 | 99.923 |
| 79 | embryo globulin                                                          | 832.4159  | 832.3878  | -0.0281 | -34 | 355 | 361 | ASEEQLR           | 31 | 34.951 |
|    |                                                                          | 991.5472  | 991.509   | -0.0382 | -39 | 181 | 188 | RPYVFGPR          | 30 | 27.349 |
|    |                                                                          | 1028.5558 | 1028.515  | -0.0408 | -40 | 222 | 230 | VAIMEVNPR         | 52 | 99.55  |
|    |                                                                          | 1360.7219 | 1360.6699 | -0.052  | -38 | 387 | 397 | DTFNLLEQRPK       | 69 | 99.991 |
| 80 | embryo globulin                                                          | 837.4101  | 837.3801  | -0.03   | -36 | 405 | 411 | LYEADAR           | 43 | 96.557 |
|    |                                                                          | 991.5472  | 991.5067  | -0.0405 | -41 | 181 | 188 | RPYVFGPR          | 31 | 39.615 |
|    |                                                                          | 1028.5558 | 1028.5132 | -0.0426 | -41 | 222 | 230 | VAIMEVNPR         | 55 | 99.784 |
| 81 | embryo globulin                                                          | 832.4159  | 832.3873  | -0.0286 | -34 | 355 | 361 | ASEEQLR           | 32 | 59.48  |
|    |                                                                          | 1360.7219 | 1360.6752 | -0.0467 | -34 | 387 | 397 | DTFNLLEQRPK       | 73 | 99.997 |
| 82 | embryo globulin                                                          | 991.5472  | 991.5135  | -0.0337 | -34 | 181 | 188 | RPYVFGPR          | 38 | 90.769 |
|    |                                                                          | 1028.5558 | 1028.519  | -0.0368 | -36 | 222 | 230 | VAIMEVNPR         | 50 | 99.36  |
|    |                                                                          | 1360.7219 | 1360.6748 | -0.0471 | -35 | 387 | 397 | DTFNLLEQRPK       | 76 | 99.998 |
| 86 | embryo globulin                                                          | 837.4101  | 837.4385  | 0.0284  | 34  | 405 | 411 | LYEADAR           | 46 | 97.995 |
|    |                                                                          | 991.5472  | 991.5724  | 0.0252  | 25  | 181 | 188 | RPYVFGPR          | 35 | 74.52  |
|    |                                                                          | 1005.4959 | 1005.5253 | 0.0294  | 29  | 329 | 336 | TSDERLER          | 30 | 16.976 |

Table S3. *Cont.*

|     |                                                                             |           |           |         |     |     |     |                     |     |        |
|-----|-----------------------------------------------------------------------------|-----------|-----------|---------|-----|-----|-----|---------------------|-----|--------|
| 89  | globulin 3                                                                  | 1028.5558 | 1028.585  | 0.0292  | 28  | 222 | 230 | VAIMEVNPR           | 54  | 99.717 |
|     |                                                                             | 1685.8606 | 1685.8547 | -0.0059 | -3  | 520 | 534 | LDDPAQELTFGRPAR     | 76  | 100    |
|     |                                                                             | 1906.0182 | 1906.0074 | -0.0108 | -6  | 470 | 488 | GSAFVVP PGHPVVEIASS | 94  | 100    |
|     |                                                                             | 2426.0967 | 2426.0835 | -0.0132 | -5  | 542 | 562 | AKDQQDEGFVAGPEQQ    | 140 | 100    |
| 90  | globulin 3                                                                  | 1906.0182 | 1905.9873 | -0.0309 | -16 | 470 | 488 | GSAFVVP PGHPVVEIASS | 114 | 100    |
|     |                                                                             | 2222.0618 | 2222.0339 | -0.0279 | -13 | 489 | 507 | GSSNLQVVCFEINAERNE  | 64  | 99.999 |
| 97  | peroxidase 1                                                                | 958.5064  | 958.5115  | 0.0051  | 5   | 113 | 120 | AVNDIRDR            | 35  | 76.675 |
|     |                                                                             | 998.5992  | 998.6032  | 0.004   | 4   | 62  | 71  | DIGLAAGLLR          | 66  | 99.981 |
|     |                                                                             | 1004.4836 | 1004.4861 | 0.0025  | 2   | 34  | 41  | GLSFDFYR            | 36  | 80.732 |
|     |                                                                             | 1772.9291 | 1772.9231 | -0.006  | -3  | 142 | 158 | DSVVVSGGPDYRVPLGR   | 67  | 99.985 |
| 99  | Chain A, Crystal Structure Of Xylanase Inhibitor Protein (Xip-I) From Wheat | 977.5414  | 977.5448  | 0.0034  | 3   | 175 | 183 | ALATGIFER           | 42  | 95.801 |
|     |                                                                             | 1150.6005 | 1150.604  | 0.0035  | 3   | 5   | 14  | TGQVTVFWGR          | 37  | 87.054 |
|     |                                                                             | 1184.563  | 1184.5685 | 0.0055  | 5   | 164 | 174 | CGYPAAHVGR          | 70  | 99.994 |
|     |                                                                             | 1308.6947 | 1308.6896 | -0.0051 | -4  | 235 | 246 | NVYYGVAPVAQK        | 40  | 93.527 |
|     |                                                                             | 1403.8118 | 1403.8142 | 0.0024  | 2   | 150 | 163 | GGPGKPLHLTATVR      | 105 | 100    |
|     |                                                                             | 1743.8562 | 1743.8577 | 0.0015  | 1   | 138 | 153 | GPIQLSHNYNYGPAGR    | 93  | 100    |
| 100 | Basic endochitinase C                                                       | 2610.1389 | 2610.1709 | 0.032   | 12  | 245 | 266 | YCDILGVGYGDNLDCYN   | 150 | 100    |
| 101 | triticin precursor                                                          | 826.3512  | 826.3547  | 0.0035  | 4   | 44  | 49  | ECTFNR              | 29  | 20.532 |
|     |                                                                             | 1381.7012 | 1381.7037 | 0.0025  | 2   | 200 | 210 | HKEFLFAGNYR         | 57  | 99.884 |
|     |                                                                             | 1639.7671 | 1639.7689 | 0.0018  | 1   | 132 | 146 | YGQSQSVQGQSQSQK     | 103 | 100    |
|     |                                                                             | 1908.9199 | 1908.9244 | 0.0045  | 2   | 211 | 227 | SSQLHSSQNIFSGFDVR   | 144 | 100    |
|     |                                                                             | 2062.8989 | 2062.9048 | 0.0059  | 3   | 61  | 77  | SQAGLTEYFDEENEQFR   | 160 | 100    |
| 102 | Os01g0760600                                                                | 848.4625  | 848.4718  | 0.0093  | 11  | 168 | 175 | VGGEFLAR            | 51  | 99.49  |
|     |                                                                             | 1448.7527 | 1448.7416 | -0.0111 | -8  | 154 | 167 | VATVQCLSGTGSLR      | 79  | 100    |
|     |                                                                             | 1530.7911 | 1530.7767 | -0.0144 | -9  | 140 | 153 | LIFGADSPAIQENR      | 98  | 100    |
| 114 | peroxidase 1                                                                | 998.5992  | 998.5979  | -0.0013 | -1  | 62  | 71  | DIGLAAGLLR          | 58  | 99.906 |
|     |                                                                             | 1772.9291 | 1772.9325 | 0.0034  | 2   | 142 | 158 | DSVVVSGGPDYRVPLGR   | 51  | 99.514 |

Table S3. *Cont.*

|     |                    |           |           |         |    |     |     |                   |     |        |
|-----|--------------------|-----------|-----------|---------|----|-----|-----|-------------------|-----|--------|
| 130 | triticin precursor | 826.3512  | 826.3613  | 0.0101  | 12 | 44  | 49  | ECTFNR            | 33  | 70.205 |
|     |                    | 885.5152  | 885.5208  | 0.0056  | 6  | 50  | 57  | LQASTPLR          | 39  | 92.653 |
|     |                    | 931.4632  | 931.4673  | 0.0041  | 4  | 147 | 153 | FKDEHQQ           | 30  | 39.307 |
|     |                    | 1263.7208 | 1263.7168 | -0.004  | -3 | 259 | 268 | FLKPVFTQQR        | 59  | 99.918 |
|     |                    | 1381.7012 | 1381.6947 | -0.0065 | -5 | 200 | 210 | HKEFLFAGNYR       | 91  | 100    |
|     |                    | 1639.7671 | 1639.7668 | -0.0003 | 0  | 132 | 146 | YGQSQSVQGQSQSQK   | 133 | 100    |
|     |                    | 1908.9199 | 1908.9104 | -0.0095 | -5 | 211 | 227 | SSQLHSSQNIFSGFDVR | 143 | 100    |
|     |                    | 2062.8989 | 2062.8926 | -0.0063 | -3 | 61  | 77  | SQAGLTEYFDEENEQFR | 141 | 100    |
| 131 | triticin precursor | 826.3512  | 826.3593  | 0.0081  | 10 | 44  | 49  | ECTFNR            | 31  | 51.425 |
|     |                    | 885.5152  | 885.5201  | 0.0049  | 6  | 50  | 57  | LQASTPLR          | 40  | 93.842 |
|     |                    | 923.4767  | 923.4813  | 0.0046  | 5  | 78  | 85  | CTGVFAIR          | 32  | 64.073 |
|     |                    | 1079.5779 | 1079.5862 | 0.0083  | 8  | 78  | 86  | CTGVFAIRR         | 38  | 91.14  |
|     |                    | 1263.7208 | 1263.7285 | 0.0077  | 6  | 259 | 268 | FLKPVFTQQR        | 53  | 99.668 |
|     |                    | 1381.7012 | 1381.7091 | 0.0079  | 6  | 200 | 210 | HKEFLFAGNYR       | 91  | 100    |
|     |                    | 1639.7671 | 1639.7738 | 0.0067  | 4  | 132 | 146 | YGQSQSVQGQSQSQK   | 133 | 100    |
|     |                    | 1908.9199 | 1908.9321 | 0.0122  | 6  | 211 | 227 | SSQLHSSQNIFSGFDVR | 135 | 100    |
| 132 | triticin precursor | 2062.8989 | 2062.9143 | 0.0154  | 7  | 61  | 77  | SQAGLTEYFDEENEQFR | 166 | 100    |
|     |                    | 826.3512  | 826.3615  | 0.0103  | 12 | 44  | 49  | ECTFNR            | 33  | 67.829 |
|     |                    | 885.5152  | 885.5229  | 0.0077  | 9  | 50  | 57  | LQASTPLR          | 52  | 99.618 |
|     |                    | 931.4632  | 931.4673  | 0.0041  | 4  | 147 | 153 | FKDEHQQ           | 37  | 85.463 |
|     |                    | 1079.5779 | 1079.5791 | 0.0012  | 1  | 78  | 86  | CTGVFAIRR         | 30  | 39.957 |
|     |                    | 1263.7208 | 1263.7192 | -0.0016 | -1 | 259 | 268 | FLKPVFTQQR        | 39  | 92.493 |
|     |                    | 1381.7012 | 1381.6997 | -0.0015 | -1 | 200 | 210 | HKEFLFAGNYR       | 91  | 100    |
|     |                    | 1639.7671 | 1639.7721 | 0.005   | 3  | 132 | 146 | YGQSQSVQGQSQSQK   | 133 | 100    |
| 133 | triticin precursor | 1908.9199 | 1908.9265 | 0.0066  | 3  | 211 | 227 | SSQLHSSQNIFSGFDVR | 146 | 100    |
|     |                    | 2062.8989 | 2062.9092 | 0.0103  | 5  | 61  | 77  | SQAGLTEYFDEENEQFR | 137 | 100    |
|     |                    | 885.5152  | 885.5148  | -0.0004 | 0  | 50  | 57  | LQASTPLR          | 47  | 98.462 |
|     |                    | 931.4632  | 931.4602  | -0.003  | -3 | 147 | 153 | FKDEHQQ           | 33  | 59.927 |

Table S3. *Cont.*

|     |                                                               |           |           |         |     |     |     |                   |     |        |
|-----|---------------------------------------------------------------|-----------|-----------|---------|-----|-----|-----|-------------------|-----|--------|
| 135 | Os01g0760600                                                  | 1381.7012 | 1381.6956 | -0.0056 | -4  | 200 | 210 | HKEFLFAGNYR       | 75  | 99.998 |
|     |                                                               | 1908.9199 | 1908.9254 | 0.0055  | 3   | 211 | 227 | SSQLHSSQNIFSGFDVR | 144 | 100    |
|     |                                                               | 2062.8989 | 2062.9116 | 0.0127  | 6   | 61  | 77  | SQAGLTEYFDEENEQFR | 143 | 100    |
|     |                                                               | 848.4625  | 848.4687  | 0.0062  | 7   | 168 | 175 | VGGEFLAR          | 29  | 14.859 |
|     |                                                               | 1448.7527 | 1448.7505 | -0.0022 | -2  | 154 | 167 | VATVQCLSGTGSLR    | 51  | 99.396 |
| 136 | 0.19 dimeric alpha-amylase inhibitor                          | 1530.7911 | 1530.7849 | -0.0062 | -4  | 140 | 153 | LIFGADSPAIQENR    | 40  | 93.376 |
|     |                                                               | 1162.6249 | 1162.6119 | -0.013  | -11 | 90  | 100 | LTAASITAVCR       | 53  | 99.815 |
|     |                                                               | 1570.8007 | 1570.7505 | -0.0502 | -32 | 26  | 39  | LQCNGSQVPEAVLR    | 108 | 100    |
|     |                                                               | 1617.8993 | 1617.8418 | -0.0575 | -36 | 86  | 100 | EVVKLTAAASITAVCR  | 94  | 100    |
| 138 | Endogenous alpha-amylase/subtilisin inhibitor                 | 1663.8361 | 1663.7784 | -0.0577 | -35 | 101 | 116 | LPIVVDASGDGAYVCK  | 137 | 100    |
|     |                                                               | 1840.7412 | 1840.661  | -0.0802 | -44 | 40  | 53  | DCCQQLADISEWCR    | 129 | 100    |
|     |                                                               | 1006.5316 | 1006.5275 | -0.0041 | -4  | 122 | 129 | ENAFRIEK          | 59  | 99.919 |
|     |                                                               | 1182.5426 | 1182.5479 | 0.0053  | 4   | 130 | 139 | YSGAEVHEYK        | 51  | 99.455 |
|     |                                                               | 1318.6433 | 1318.6582 | 0.0149  | 11  | 27  | 40  | AHGGGLTMAPGHGR    | 82  | 100    |
|     |                                                               | 1366.675  | 1366.6927 | 0.0177  | 13  | 15  | 26  | ADANYYYVLPANR     | 74  | 99.997 |
|     |                                                               | 1431.8066 | 1431.828  | 0.0214  | 15  | 61  | 74  | IAPHGGAPSDKIIR    | 99  | 100    |
|     |                                                               | 1506.7006 | 1506.7258 | 0.0252  | 17  | 42  | 54  | CPLFVSQEADGQR     | 107 | 100    |
|     |                                                               | 1574.8398 | 1574.873  | 0.0332  | 21  | 107 | 121 | HVITGPVRDPSPSGR   | 60  | 99.929 |
|     |                                                               | 2144.0554 | 2144.1357 | 0.0803  | 37  | 42  | 60  | CPLFVSQEADGQRDGLP | 51  | 99.401 |
| 201 | ribulose-1,5-bisphosphate carboxylase/oxygenase large subunit | 1187.6644 | 1187.6587 | -0.0057 | -5  | 286 | 295 | DNGLLLHIHR        | 65  | 99.958 |
|     |                                                               | 1339.7006 | 1339.6816 | -0.019  | -14 | 9   | 21  | AGVGFQAGVKDYK     | 71  | 99.988 |
|     |                                                               | 1465.7546 | 1465.7396 | -0.015  | -10 | 147 | 159 | TFQGPPHGIQVER     | 103 | 100    |
| 202 | ribulose-1,5-bisphosphate carboxylase/oxygenase large subunit | 898.41    | 898.4231  | 0.0131  | 15  | 306 | 312 | NHGMHFR           | 44  | 92.822 |
|     |                                                               | 971.4073  | 971.4184  | 0.0111  | 11  | 188 | 194 | ACYECLR           | 46  | 95.225 |
|     |                                                               | 985.5789  | 985.5862  | 0.0073  | 7   | 132 | 139 | ALRLEDLR          | 45  | 94.39  |

Table S3. *Cont.*

|     |                                             |           |           |         |     |     |     |                    |     |        |
|-----|---------------------------------------------|-----------|-----------|---------|-----|-----|-----|--------------------|-----|--------|
| 203 | Alanine aminotransferase 2                  | 1021.5312 | 1021.5359 | 0.0047  | 5   | 33  | 41  | DTDILAAFR          | 61  | 99.87  |
|     |                                             | 1116.583  | 1116.584  | 0.001   | 1   | 422 | 431 | VALEACVQAR         | 53  | 99.145 |
|     |                                             | 1187.6644 | 1187.6661 | 0.0017  | 1   | 286 | 295 | DNGLLLHIHR         | 91  | 100    |
|     |                                             | 1465.7546 | 1465.7429 | -0.0117 | -8  | 147 | 159 | TFQGPPHGIQVER      | 116 | 100    |
|     |                                             | 1502.8512 | 1502.8303 | -0.0209 | -14 | 165 | 177 | YGRPLLGCTIKPK      | 43  | 91.509 |
|     |                                             | 1022.5741 | 1022.5818 | 0.0077  | 8   | 23  | 31  | GEIVIHAQR          | 34  | 70.108 |
|     |                                             | 1089.4783 | 1089.4875 | 0.0092  | 8   | 300 | 308 | GYYGECGKR          | 51  | 99.392 |
|     |                                             | 1096.5634 | 1096.5701 | 0.0067  | 6   | 87  | 96  | TLFSADSISR         | 37  | 85.889 |
|     |                                             | 1219.6066 | 1219.6086 | 0.002   | 2   | 108 | 119 | ATGAYSHSQGIK       | 86  | 100    |
|     |                                             | 1243.7004 | 1243.7008 | 0.0004  | 0   | 362 | 373 | AEKDGLASLAR        | 81  | 100    |
| 204 | Os04g0118400                                | 1407.7379 | 1407.734  | -0.0039 | -3  | 415 | 427 | AANKAPDAFYALR      | 104 | 100    |
|     |                                             | 890.5095  | 890.5095  | 0       | 0   | 483 | 490 | FSVSPVVR           | 36  | 78.877 |
|     |                                             | 1346.7791 | 1346.7673 | -0.0118 | -9  | 713 | 724 | VIYASQLTAKPR       | 34  | 70.368 |
| 205 | Os06g0247500                                | 1339.6853 | 1339.682  | -0.0033 | -2  | 26  | 37  | LASVYSEVQTSR       | 35  | 82.551 |
| 208 | ADP-glucose pyrophosphorylase large subunit | 952.4887  | 952.4886  | -0.0001 | 0   | 380 | 387 | TPFFTSPR           | 42  | 95.373 |
| 209 | ADP-glucose pyrophosphorylase large subunit | 1023.5945 | 1023.5914 | -0.0031 | -3  | 415 | 423 | IEHSIIGVR          | 38  | 87.403 |
|     |                                             | 1261.6359 | 1261.6361 | 0.0002  | 0   | 111 | 122 | ATPAVPIGGCYR       | 65  | 99.975 |
|     |                                             | 1306.6243 | 1306.6259 | 0.0016  | 1   | 468 | 478 | ISNCIIDMNAR        | 31  | 46.138 |
|     |                                             | 1515.7438 | 1515.7467 | 0.0029  | 2   | 251 | 264 | ASEYGLVKFDSSGR     | 61  | 99.938 |
|     |                                             | 2055.9399 | 2055.9553 | 0.0154  | 7   | 232 | 250 | HVDDNADITLSCAPVGES | 57  | 99.837 |
|     |                                             | 952.4887  | 952.4885  | -0.0002 | 0   | 380 | 387 | TPFFTSPR           | 51  | 99.241 |
|     |                                             | 1023.5945 | 1023.5903 | -0.0042 | -4  | 415 | 423 | IEHSIIGVR          | 56  | 99.762 |
|     |                                             | 1261.6359 | 1261.6304 | -0.0055 | -4  | 111 | 122 | ATPAVPIGGCYR       | 66  | 99.979 |
|     |                                             | 1306.6243 | 1306.6161 | -0.0082 | -6  | 468 | 478 | ISNCIIDMNAR        | 80  | 100    |
|     |                                             | 1440.7628 | 1440.7571 | -0.0057 | -4  | 412 | 423 | ECKIEHSIIGVR       | 72  | 99.995 |
|     |                                             | 1515.7438 | 1515.7361 | -0.0077 | -5  | 251 | 264 | ASEYGLVKFDSSGR     | 106 | 100    |

Table S3. *Cont.*

|     |                                  |           |           |         |     |     |     |                   |     |        |
|-----|----------------------------------|-----------|-----------|---------|-----|-----|-----|-------------------|-----|--------|
| 210 | Os01g0328700                     | 1646.8174 | 1646.8071 | -0.0103 | -6  | 321 | 334 | YAE LHDFGSEILPR   | 82  | 100    |
|     |                                  | 2371.1924 | 2371.197  | 0.0046  | 2   | 54  | 77  | GPAATGAQCVLTSASP  | 177 | 100    |
|     |                                  | 969.4901  | 969.4843  | -0.0058 | -6  | 101 | 109 | SSFAHHGVK         | 62  | 99.963 |
|     |                                  | 1523.7423 | 1523.7343 | -0.008  | -5  | 88  | 100 | ALLHSSHMYHEAK     | 69  | 99.993 |
| 213 | Alanine aminotransferase 2       | 1539.7373 | 1539.7253 | -0.012  | -8  | 88  | 100 | ALLHSSHMYHEAK     | 51  | 99.582 |
|     |                                  | 1022.5741 | 1022.5797 | 0.0056  | 5   | 23  | 31  | GEIVIIHAQR        | 41  | 94.869 |
|     |                                  | 1089.4783 | 1089.486  | 0.0077  | 7   | 300 | 308 | GYGECGKR          | 50  | 99.373 |
|     |                                  | 1096.5634 | 1096.5677 | 0.0043  | 4   | 87  | 96  | TLFSADSISR        | 37  | 84.716 |
| 214 | beta amylase                     | 1219.6066 | 1219.6078 | 0.0012  | 1   | 108 | 119 | ATGAYSHSQGIK      | 78  | 99.999 |
|     |                                  | 1243.7004 | 1243.7026 | 0.0022  | 2   | 362 | 373 | AEKDILASLAR       | 89  | 100    |
|     |                                  | 1407.7379 | 1407.7416 | 0.0037  | 3   | 415 | 427 | AANKAPDAFYALR     | 113 | 100    |
|     |                                  | 1006.554  | 1006.5582 | 0.0042  | 4   | 211 | 219 | NARPHGINK         | 39  | 91.145 |
| 301 | F0-F1 ATPase alpha subunit       | 1299.582  | 1299.5801 | -0.0019 | -1  | 151 | 161 | ASLNFTCAEMR       | 70  | 99.993 |
|     |                                  | 1326.6688 | 1326.6675 | -0.0013 | -1  | 200 | 210 | YDPTAYNTILR       | 79  | 100    |
|     |                                  | 1474.6777 | 1474.676  | -0.0017 | -1  | 187 | 199 | EGLNMACENALPR     | 105 | 100    |
|     |                                  | 1646.781  | 1646.7767 | -0.0043 | -3  | 61  | 74  | FFVDNGTYLTEQGR    | 85  | 100    |
| 303 | aestivum stearoyl-ACP desaturase | 1668.7952 | 1668.7894 | -0.0058 | -3  | 33  | 47  | AAAAMVGHPEWEFPR   | 52  | 99.52  |
|     |                                  | 1026.5942 | 1026.6088 | 0.0146  | 14  | 143 | 152 | AVDSLVPGR         | 54  | 99.003 |
|     |                                  | 1438.8489 | 1438.8104 | -0.0385 | -27 | 352 | 365 | GIRPAINVGLSVSR    | 43  | 87.956 |
|     |                                  | 1537.7434 | 1537.7026 | -0.0408 | -27 | 284 | 296 | EAFPGDVFYLSHR     | 119 | 100    |
| 303 | aestivum stearoyl-ACP desaturase | 1664.8789 | 1664.8187 | -0.0602 | -36 | 377 | 390 | QVCGSLKLELAQYR    | 91  | 100    |
|     |                                  | 1834.8429 | 1834.7703 | -0.0726 | -40 | 7   | 21  | MTNFYTNFQVDEIGR   | 125 | 100    |
|     |                                  | 1850.8378 | 1850.7521 | -0.0857 | -46 | 7   | 21  | MTNFYTNFQVDEIGR   | 153 | 100    |
|     |                                  | 2025.1267 | 2025.0051 | -0.1216 | -60 | 416 | 432 | LTEVLKQPQYEPLPIEK | 80  | 99.997 |
| 303 | aestivum stearoyl-ACP desaturase | 2157.0532 | 2156.916  | -0.1372 | -64 | 32  | 51  | VYGLNEIQAGEMVEFAS | 107 | 100    |
|     |                                  | 2308.1567 | 2308.0295 | -0.1272 | -55 | 391 | 412 | EVAFAQFGSDLDAAATQ | 221 | 100    |
|     |                                  | 1410.7264 | 1410.7544 | 0.028   | 20  | 325 | 336 | DYADILEFLVGR      | 107 | 100    |
|     |                                  | 1573.8367 | 1573.8685 | 0.0318  | 20  | 247 | 260 | LAQICGIIASDEKR    | 68  | 99.951 |

Table S3. *Cont.*

|     |                                                                  |           |           |         |     |     |     |                     |     |        |
|-----|------------------------------------------------------------------|-----------|-----------|---------|-----|-----|-----|---------------------|-----|--------|
| 304 | beta amylase                                                     | 2078.9819 | 2079.0569 | 0.075   | 36  | 210 | 226 | TENNPYLGFIYTSFQER   | 145 | 100    |
|     |                                                                  | 1326.6688 | 1326.6752 | 0.0064  | 5   | 200 | 210 | YDPTAYNTILR         | 64  | 99.873 |
|     |                                                                  | 1646.781  | 1646.7843 | 0.0033  | 2   | 61  | 74  | FFVDNGTYLTEQGR      | 98  | 100    |
|     |                                                                  | 1668.7952 | 1668.8022 | 0.007   | 4   | 33  | 47  | AAAAMVGHPEWEFPR     | 35  | 13.627 |
|     |                                                                  | 1684.79   | 1684.79   | 0       | 0   | 33  | 47  | AAAAMVGHPEWEFPR     | 49  | 96.332 |
| 310 | UDP-glucose pyrophosphorylase                                    | 2013.9778 | 2013.9912 | 0.0134  | 7   | 119 | 136 | VPSHAAEITAGYYNLHDR  | 113 | 100    |
|     |                                                                  | 1052.5371 | 1052.5259 | -0.0112 | -11 | 261 | 270 | GGTLISYEGR          | 61  | 99.799 |
|     |                                                                  | 1312.7583 | 1312.7523 | -0.006  | -5  | 333 | 345 | VLQLETAAGAAIR       | 105 | 100    |
|     |                                                                  | 1358.7566 | 1358.7385 | -0.0181 | -13 | 172 | 183 | IVTEDFLPLPSK        | 74  | 99.99  |
|     |                                                                  | 1769.9796 | 1769.9667 | -0.0129 | -7  | 391 | 406 | VKPSNPSIELGPEFKK    | 106 | 100    |
|     |                                                                  | 1949.0338 | 1949.0333 | -0.0005 | 0   | 22  | 39  | LGEISENEKAGFISLVS   | 78  | 99.995 |
|     |                                                                  | 1967.0121 | 1967.0092 | -0.0029 | -1  | 218 | 235 | EYVVFVANSNDLGAIVDIK | 126 | 100    |
|     |                                                                  | 2198.0261 | 2198.0547 | 0.0286  | 13  | 154 | 171 | YSNSNIEIHTFNQSQYPR  | 120 | 100    |
| 311 | sucrose synthase type 2                                          | 2454.3127 | 2454.3572 | 0.0445  | 18  | 365 | 386 | ATSDLLLQSDLYTLVDG   | 134 | 100    |
|     |                                                                  | 1320.7158 | 1320.7036 | -0.0122 | -9  | 67  | 77  | LKDТАFEDLLR         | 67  | 99.934 |
|     |                                                                  | 1425.6904 | 1425.6851 | -0.0053 | -4  | 343 | 355 | LLPDAHGTTTCGQR      | 65  | 99.889 |
|     |                                                                  | 1779.9423 | 1779.9354 | -0.0069 | -4  | 602 | 617 | LQELVNLVVVCGDHGK    | 123 | 100    |
|     |                                                                  | 1915.9873 | 1916.0013 | 0.014   | 7   | 20  | 37  | IGDSL SAHTNELVAVFSR | 145 | 100    |
| 312 | sucrose synthase type 2                                          | 2393.1633 | 2393.2205 | 0.0572  | 24  | 215 | 235 | KAETHLSGLPADTPYSEF  | 93  | 100    |
|     |                                                                  | 1320.7158 | 1320.6997 | -0.0161 | -12 | 67  | 77  | LKDТАFEDLLR         | 81  | 99.997 |
|     |                                                                  | 1779.9423 | 1779.9303 | -0.012  | -7  | 602 | 617 | LQELVNLVVVCGDHGK    | 108 | 100    |
|     |                                                                  | 1915.9873 | 1915.9974 | 0.0101  | 5   | 20  | 37  | IGDSL SAHTNELVAVFSR | 133 | 100    |
| 313 | ribulose-1,5-bisphosphate<br>carboxylase/oxygenase large subunit | 2393.1633 | 2393.2087 | 0.0454  | 19  | 215 | 235 | KAETHLSGLPADTPYSEF  | 48  | 94.276 |
|     |                                                                  | 1465.7546 | 1465.7535 | -0.0011 | -1  | 147 | 159 | TFQGPPHGIQVER       | 95  | 100    |
|     |                                                                  | 2169.9871 | 2170.0032 | 0.0161  | 7   | 195 | 213 | GGLDFTKDDENVNSQPF   | 63  | 99.753 |
|     |                                                                  | 2185.9819 | 2185.9734 | -0.0085 | -4  | 195 | 213 | GGLDFTKDDENVNSQPF   | 39  | 38.504 |
| 316 | alpha-galactosidase                                              | 1113.6085 | 1113.6025 | -0.006  | -5  | 84  | 93  | APLLIGCDVR          | 74  | 99.991 |

Table S3. *Cont.*

|     |                          |           |           |         |     |     |     |                     |     |        |
|-----|--------------------------|-----------|-----------|---------|-----|-----|-----|---------------------|-----|--------|
| 317 | predicted protein        | 1262.674  | 1262.682  | 0.008   | 6   | 101 | 111 | LWDLSTGLTTR         | 62  | 99.808 |
|     |                          | 1321.6747 | 1321.6875 | 0.0128  | 10  | 119 | 130 | DVISVAFSVDNR        | 101 | 100    |
|     |                          | 1605.896  | 1605.9014 | 0.0054  | 3   | 282 | 295 | HVVQDLKPEVQVSK      | 93  | 100    |
|     |                          | 2453.2419 | 2453.3022 | 0.0603  | 25  | 16  | 39  | GHNDVVTAIAAPIDNSPYI | 152 | 100    |
| 318 | predicted protein        | 1169.5256 | 1169.5424 | 0.0168  | 14  | 35  | 44  | ADEGYCLSVR          | 53  | 98.65  |
|     |                          | 1858.9082 | 1858.9468 | 0.0386  | 21  | 174 | 191 | ILPWGEEAYAGGSANAP   | 152 | 100    |
|     |                          | 2499.2197 | 2499.3049 | 0.0852  | 34  | 303 | 324 | MVNNIYLNFDALHGDKEH  | 95  | 100    |
|     |                          | 2515.2146 | 2515.2698 | 0.0552  | 22  | 303 | 324 | MVNNIYLNFDALHGDKEH  | 107 | 100    |
| 319 | ascorbate peroxidase     | 1249.6172 | 1249.6163 | -0.0009 | -1  | 121 | 131 | QDKPEPPPEGR         | 55  | 99.14  |
|     |                          | 1309.6495 | 1309.645  | -0.0045 | -3  | 132 | 143 | LPDATQGSDDLRL       | 101 | 100    |
|     |                          | 2046.908  | 2046.855  | -0.053  | -26 | 225 | 242 | YAADEDAFFADYAEHLK   | 131 | 100    |
| 320 | Triosephosphat-isomerase | 954.4832  | 954.4866  | 0.0034  | 4   | 5   | 12  | FFVGGNWK            | 44  | 88.452 |
|     |                          | 1289.6332 | 1289.6414 | 0.0082  | 6   | 195 | 206 | TNVSPEVAESTR        | 57  | 99.37  |
|     |                          | 1374.7046 | 1374.7117 | 0.0071  | 5   | 124 | 135 | VIACVGETLEQR        | 98  | 100    |
|     |                          | 1415.6359 | 1415.6383 | 0.0024  | 2   | 101 | 113 | SLMGESSEFVGK        | 60  | 99.68  |
|     |                          | 1590.8347 | 1590.8466 | 0.0119  | 7   | 176 | 190 | VASPAQAQEVHANLR     | 88  | 100    |
|     |                          | 1811.9585 | 1811.9727 | 0.0142  | 8   | 56  | 70  | LRPEIQVAAQNCWVK     | 83  | 99.999 |
|     |                          | 2133.1199 | 2133.1438 | 0.0239  | 11  | 176 | 194 | VASPAQAQEVHANLRDW   | 75  | 99.99  |
| 322 | serpin 1                 | 925.5214  | 925.5332  | 0.0118  | 13  | 11  | 18  | LSIAHQTR            | 49  | 95.731 |
|     |                          | 1151.6824 | 1151.6813 | -0.0011 | -1  | 172 | 181 | LVLANALYFK          | 74  | 99.988 |
|     |                          | 1176.5896 | 1176.5977 | 0.0081  | 7   | 262 | 271 | LSAEPDFLER          | 94  | 100    |
|     |                          | 1292.7097 | 1292.7112 | 0.0015  | 1   | 290 | 301 | ISFGIEASDLLK        | 80  | 99.997 |
|     |                          | 1544.7592 | 1544.7596 | 0.0004  | 0   | 125 | 137 | YKAETQSVDFQTK       | 90  | 100    |
|     |                          | 2685.3955 | 2685.4629 | 0.0674  | 25  | 33  | 61  | SAASNAAFSPVSLHSALS  | 213 | 100    |
|     |                          | 2720.3525 | 2720.3843 | 0.0318  | 12  | 329 | 354 | VSSVFHQAFVEVNEQGT   | 218 | 100    |
| 323 | Serpins-Z1C              | 925.5214  | 925.5155  | -0.0059 | -6  | 11  | 18  | LSIAHQTR            | 38  | 60.779 |
|     |                          | 1176.5896 | 1176.5905 | 0.0009  | 1   | 261 | 270 | LSAEPDFLER          | 87  | 100    |
|     |                          | 1627.8578 | 1627.8511 | -0.0067 | -4  | 287 | 300 | FKISFETEASDLLK      | 80  | 99.998 |

Table S3. *Cont.*

|     |                                                   |           |           |        |    |     |     |                     |     |        |
|-----|---------------------------------------------------|-----------|-----------|--------|----|-----|-----|---------------------|-----|--------|
| 314 | Alpha-amylase/trypsin inhibitor CM3;              | 1110.5038 | 1110.519  | 0.0152 | 14 | 133 | 140 | EMQWDFVR            | 56  | 99.188 |
|     |                                                   | 1126.4987 | 1126.5079 | 0.0092 | 8  | 133 | 140 | EMQWDFVR            | 50  | 97.125 |
|     |                                                   | 1698.9214 | 1698.9276 | 0.0062 | 4  | 101 | 115 | YFIALPVPSQPVDPR     | 83  | 99.999 |
|     |                                                   | 1727.8381 | 1727.8497 | 0.0116 | 7  | 116 | 132 | SGNVGESGLIDLPGCPR   | 146 | 100    |
|     |                                                   | 1876.0222 | 1876.0356 | 0.0134 | 7  | 141 | 157 | LLVAPGQCNLATIHNV    | 119 | 100    |
|     |                                                   | 1957.8564 | 1957.8749 | 0.0185 | 9  | 81  | 95  | LYCCQELAEISQQCR     | 116 | 100    |
| 315 | predicted protein                                 | 1786.9375 | 1786.9623 | 0.0248 | 14 | 691 | 706 | AYLPVIESFGFSSTLR    | 112 | 100    |
|     |                                                   | 2206.0122 | 2206.0635 | 0.0513 | 23 | 83  | 100 | CFLELQVEGEEAYQTFS   | 41  | 78.529 |
|     |                                                   | 2384.188  | 2384.2451 | 0.0571 | 24 | 269 | 288 | YRVENLYEGPLDDIYANA  | 61  | 99.803 |
|     |                                                   | 2646.3479 | 2646.3503 | 0.0024 | 1  | 41  | 64  | ITDGALVVVDCIEGVCVQ  | 136 | 100    |
| 324 | methionine synthase 1 enzyme<br>[Hordeum vulgare] | 1096.5786 | 1096.5931 | 0.0145 | 13 | 287 | 296 | YLFAGVVDGR          | 44  | 91.127 |
|     |                                                   | 2043.0295 | 2043.0526 | 0.0231 | 11 | 685 | 704 | EGVVYGAGIGPGVYDIHS  | 154 | 100    |
|     |                                                   | 2268.1719 | 2268.2031 | 0.0312 | 14 | 590 | 610 | EVEDLEAGGIQVIQIDEAA | 180 | 100    |
| 325 | phosphoglucomutase                                | 1747.8973 | 1747.9086 | 0.0113 | 6  | 9   | 24  | ETKPYEGQKPGTSGLR    | 64  | 99.916 |
|     |                                                   | 1846.8582 | 1846.8594 | 0.0012 | 1  | 222 | 238 | FSFCFDGLHGVAGAYAK   | 113 | 100    |
|     |                                                   | 1918.8414 | 1918.8523 | 0.0109 | 6  | 285 | 303 | TSNVEPPEFGAAADGDA   | 41  | 81.954 |
|     |                                                   | 2012.1176 | 2012.137  | 0.0194 | 10 | 86  | 104 | VWVGQDSLLSTPAVSAII  | 55  | 99.242 |
|     |                                                   | 2168.2188 | 2168.2332 | 0.0144 | 7  | 85  | 104 | RVWVGQDSLLSTPAVSAI  | 38  | 65.929 |
|     |                                                   | 2301.1511 | 2301.1521 | 0.001  | 0  | 114 | 136 | ATGAFILTASHNPGGPTE  | 90  | 100    |
| 327 | beta amylase [Triticum aestivum]                  | 1326.6688 | 1326.6779 | 0.0091 | 7  | 200 | 210 | YDPTAYNTILR         | 75  | 99.99  |
|     |                                                   | 1646.781  | 1646.7937 | 0.0127 | 8  | 61  | 74  | FFVDNGTYLTEQGR      | 98  | 100    |
|     |                                                   | 1668.7952 | 1668.8097 | 0.0145 | 9  | 33  | 47  | AAAAMVGHPEWEFPR     | 64  | 99.862 |
|     |                                                   | 1684.79   | 1684.7947 | 0.0047 | 3  | 33  | 47  | AAAAMVGHPEWEFPR     | 43  | 86.173 |
|     |                                                   | 2013.9778 | 2013.9999 | 0.0221 | 11 | 119 | 136 | VPSHAAEITAGYYNLHDR  | 101 | 100    |
| 328 | predicted protein                                 | 1473.8424 | 1473.882  | 0.0396 | 27 | 429 | 442 | LGANSLLDIVVFR       | 110 | 100    |
|     |                                                   | 1518.7336 | 1518.7769 | 0.0433 | 29 | 585 | 596 | HSLGYWEDEKVR        | 47  | 94.326 |
|     |                                                   | 1607.8428 | 1607.89   | 0.0472 | 29 | 124 | 137 | AVIELENYGLPFSR      | 89  | 100    |

Table S3. *Cont.*

|     |                                                      |           |           |         |     |     |     |                     |     |        |
|-----|------------------------------------------------------|-----------|-----------|---------|-----|-----|-----|---------------------|-----|--------|
| 329 | ATP synthase CF1 alpha subunit                       | 1115.5691 | 1115.5635 | -0.0056 | -5  | 492 | 500 | EAIQEQLER           | 45  | 90.272 |
|     |                                                      | 1416.7845 | 1416.7795 | -0.005  | -4  | 95  | 107 | IAQIPVSEAYLGR       | 103 | 100    |
|     |                                                      | 1507.7639 | 1507.7437 | -0.0202 | -13 | 444 | 456 | GYLDSLEIEQVVK       | 71  | 99.976 |
|     |                                                      | 1519.8051 | 1519.8019 | -0.0032 | -2  | 189 | 202 | GQGVICVYVAIGQR      | 116 | 100    |
|     |                                                      | 1553.7384 | 1553.7358 | -0.0026 | -2  | 285 | 297 | EAYPGDVFLHSR        | 107 | 100    |
|     |                                                      | 1986.0656 | 1986.0521 | -0.0135 | -7  | 464 | 480 | HLKDTKPQFQEISSSK    | 110 | 100    |
|     |                                                      | 2121.0896 | 2121.1042 | 0.0146  | 7   | 42  | 61  | IIGLGEIMSGELVEFAEGT | 59  | 99.65  |
|     |                                                      | 2137.0845 | 2137.0798 | -0.0047 | -2  | 42  | 61  | IIGLGEIMSGELVEFAEGT | 75  | 99.991 |
|     |                                                      | 2167.208  | 2167.2136 | 0.0056  | 3   | 108 | 128 | VVNALAKPIDGKGEIASE  | 148 | 100    |
|     |                                                      | 2316.1831 | 2316.2075 | 0.0244  | 11  | 423 | 443 | QSQANPLPVEEQIATITYT | 160 | 100    |
| 330 | hypothetical protein<br>SORBIDRAFT_02g029260         | 1381.6781 | 1381.6759 | -0.0022 | -2  | 54  | 66  | CVLASSGFQGDIK       | 53  | 98.404 |
|     |                                                      | 1465.7659 | 1465.7765 | 0.0106  | 7   | 76  | 86  | ELLYQHQHNKR         | 71  | 99.977 |
|     |                                                      | 2023.9801 | 2023.9877 | 0.0076  | 4   | 105 | 122 | FFPYAFNVLGGLDSEG    | 56  | 99.347 |
| 331 | tissue-ubiquitous beta-amylase<br>2[Sorghum bicolor] | 2087.0557 | 2087.093  | 0.0373  | 18  | 129 | 146 | NIEYLTLGVDDQPLFHGR  | 105 | 100    |
| 332 | predicted protein                                    | 1278.6365 | 1278.6577 | 0.0212  | 17  | 267 | 277 | ITSFLDPDGWK         | 64  | 99.908 |
| 334 | dehydroascorbate reductase                           | 1202.682  | 1202.6826 | 0.0006  | 0   | 102 | 111 | IFSTFVTFLK          | 56  | 99.272 |
|     |                                                      | 1497.8213 | 1497.8207 | -0.0006 | 0   | 157 | 168 | LYHLQVALEHFK        | 82  | 99.998 |
|     |                                                      | 1574.8578 | 1574.855  | -0.0028 | -2  | 40  | 52  | LIDVSNKPDWFLK       | 104 | 100    |
|     |                                                      | 1607.8639 | 1607.8619 | -0.002  | -1  | 122 | 135 | ALVDELQALEEHLK      | 68  | 99.945 |
|     |                                                      | 1827.8444 | 1827.8525 | 0.0081  | 4   | 8   | 24  | AAVGHPDTLGDCPFSQR   | 140 | 100    |
|     |                                                      | 2021.0338 | 2021.0532 | 0.0194  | 10  | 172 | 189 | VPETLTSVHAYTEALFSR  | 134 | 100    |
|     |                                                      | 2392.2295 | 2392.271  | 0.0415  | 17  | 169 | 189 | GWKVPETLTSVHAYTEA   | 70  | 99.966 |

<sup>a</sup> Calculated molecular mass of the predicted protein; <sup>b</sup> Observed molecular mass of the predicted protein; <sup>c</sup> Start position of the identified peptide fragment in the protein sequence; <sup>d</sup> End position of the identified peptide fragment in the protein sequence; <sup>e</sup> Multiple matches to peptides with the same primary sequence count; <sup>f</sup> Threshold ion score of credible identification.
